# Supplementary material
Source: Elsevier journal article supplement (https://www.sciencedirect.com/science/article/pii/S0213911119301165)
Supplement: mmc1 [file S0213911119301165:mmc1.docx]

**Apéndice**

**Características de la población del Baix Empordà residente en las áreas básicas de salud (ABS) gestionadas por Serveis de Salut Integrats Baix Empordá (SSIBE)**

La población atendida por SSIBE reside en la comarca del Baix Empordà (Cataluña) y está distribuida en cuatro ABS.

**Población**

Extracción inicial de la población a 31/12/2015 para la obtención del estado de salud (N = 91.067). Edad actualizada a 2016.

Criterio de exclusión *a priori:* muerte, actualizado en el momento de obtención de la muestra. Estratos con 0 casos: 0.

**Extracción de la muestra estratificada y ponderada**

Criterios de exclusión *a posteriori:*

- Sin teléfono de contacto o erróneo.
- No residentes en las cuatro ABS (en el momento de la extracción).

Tamaño final de la población: N = 89.960. Estratos con 0 casos: 5.

De acuerdo con la distribución que se muestra en las tablas I a III, la población se consideró un conjunto único y no se tuvo en cuenta como elemento de estratificación la residencia en las diferentes ABS.

**Tabla I**

Distribución de la población por sexo y grupo de edad, según criterios utilizados en la Encuesta de Salud de Cataluña (ESCA)

|  |  | ABS 1 | | ABS 2 | | ABS 3 | | ABS 4 | | Total | | Variación (%) | |
| --- | --- | --- | --- | --- | --- | --- | --- | --- | --- | --- | --- | --- | --- |
| Sexo | **Edad** | **N** | **%** | **N** | **%** | **N** | **%** | **N** | **%** | **N** | **%** | **Min** | **Max** |
| Hombre | 0-14 | 1444 | 17,5 | 2167 | 15,8 | 2538 | 16,7 | 1259 | 16,1 | 7408 | 16,4 | 15,8 | 17,5 |
| 15-44 | 3166 | 38,4 | 5352 | 38,9 | 6058 | 39,8 | 3151 | 40,2 | 17.727 | 39,4 | 38,4 | 40,2 |
| 45-64 | 2344 | 28,4 | 3885 | 28,2 | 4216 | 27,7 | 2204 | 28,1 | 12.649 | 28,1 | 27,7 | 28,4 |
| 65-74 | 718 | 8,7 | 1310 | 9,5 | 1273 | 8,4 | 660 | 8,4 | 3961 | 8,8 | 8,4 | 9,5 |
| 75 o más | 582 | 7,1 | 1040 | 7,6 | 1119 | 7,4 | 558 | 7,1 | 3299 | 7,3 | 7,1 | 7,6 |
| Mujer | 0-14 | 1308 | 16,0 | 2026 | 14,2 | 2376 | 15,6 | 1167 | 15,9 | 6877 | 15,3 | 14,2 | 16,0 |
| 15-44 | 3025 | 37,1 | 5241 | 36,8 | 5682 | 37,4 | 2795 | 38,0 | 16.743 | 37,3 | 36,8 | 38,0 |
| 45-64 | 2189 | 26,9 | 3964 | 27,9 | 4069 | 26,8 | 1929 | 26,3 | 12.151 | 27,1 | 26,3 | 27,9 |
| 65-74 | 762 | 9,3 | 1460 | 10,3 | 1369 | 9,0 | 670 | 9,1 | 4261 | 9,5 | 9,0 | 10,3 |
| 75 o más | 866 | 10,6 | 1535 | 10,8 | 1697 | 11,2 | 786 | 10,7 | 4884 | 10,9 | 10,6 | 11,2 |
|  |  | 16.404 |  | 27.980 |  | 30.397 |  | 15.179 |  | 89.960 |  |  |  |

**Tabla II**

Distribución de la población según el estado de salud, obtenido según los *Clinical Risk Groups* (CRG), descrito en el texto del artículo como estado de salud a partir de la morbilidad atendida (ESMA). Para la obtención de la encuesta se procedió a la agrupación de los nueve estados de salud de los CRG en los cinco utilizados en el artículo

| Estado | |  | |  | |  | |  | |  | |
| --- | --- | --- | --- | --- | --- | --- | --- | --- | --- | --- | --- |
| **ABS 1** | | **ABS 2** | | **ABS 3** | | **ABS 4** | | **Total** | | **Variación (%)** | |
| **N** | **%** | **N** | **%** | **N** | **%** | **N** | **%** | **N** | **%** | **Mín.** | **Máx.** |
| Sano | | | | | | | | | | | |
| 7.913 | 48,2 | 13.228 | 47,3 | 15.085 | 49,6 | 8.043 | 52,9 | 44.269 | 49,2 | 47,3 | 52,9 |
| Problemas agudos | | | | | | | | | | | |
| 1.226 | 7,5 | 2.299 | 8,2 | 2.399 | 7,9 | 1.156 | 7,6 | 7.080 | 7,9 | 7,5 | 8,2 |
| Enfermedad crónica menor única | | | | | | | | | | | |
| 1.534 | 9,4 | 2.644 | 9,4 | 2.650 | 8,7 | 1.395 | 9,2 | 8.223 | 9,1 | 8,7 | 9,4 |
| Enfermedades crónicas menores en diferentes órganos | | | | | | | | | | | |
| 596 | 3,6 | 968 | 3,5 | 741 | 2,4 | 446 | 2,9 | 2.751 | 3,1 | 2,4 | 3,6 |
| Enfermedad crónica dominante única | | | | | | | | | | | |
| 2.145 | 13,1 | 3.849 | 13,8 | 4.019 | 13,2 | 1.891 | 12,5 | 11.904 | 13,2 | 12,5 | 13,8 |
| Dos enfermedades crónicas dominantes | | | | | | | | | | | |
| 2.631 | 16,0 | 4.393 | 15,7 | 4.841 | 15,9 | 2.000 | 13,2 | 13.865 | 15,4 | 13,2 | 16,0 |
| Más de dos enfermedades crónicas dominantes | | | | | | | | | | | |
| 217 | 1,3 | 364 | 1,3 | 438 | 1,4 | 156 | 1,0 | 1.175 | 1,3 | 1,0 | 1,4 |
| Enfermedad neoplásica metastática | | | | | | | | | | | |
| 72 | 0,4 | 155 | 0,6 | 143 | 0,5 | 63 | 0,4 | 733 | 0,5 | 0,4 | 0,6 |
| Enfermedades catastróficas | | | | | | | | | | | |
| 70 | 0,4 | 80 | 0,3 | 81 | 0,3 | 29 | 0,2 | 260 | 0,3 | 0,2 | 0,4 |
| 16.404 | 100,0 | 27.980 | 100,0 | 30.397 | 100,0 | 15.179 | 100,0 | 89.960 | 100,0 | 100,0 | 100,0 |

**Tabla III**

Distribución por edad, sexo y estado de salud de la población y de la muestra

|  |  | Estado 1 | | Estado 2 | | Estados 3/4 | | Estados 5/6 | | Estados 7/8/9 | |  |
| --- | --- | --- | --- | --- | --- | --- | --- | --- | --- | --- | --- | --- |
| Edad (años) / Sexo | | **M** | **F** | **M** | **F** | **M** | **F** | **M** | **F** | **M** | **F** | **Total** |
| 0-14 | N | 5416 | 5158 | 918 | 780 | 484 | 455 | 662 | 541 | 8 | 7 | 14.429 |
| n | 72 | 68 | 12 | 10 | 6 | 6 | 9 | 7 | - | - | 190 |
| % | 5,9 | 5,7 | 1,0 | 0,9 | 0,5 | 0,5 | 0,7 | 0,6 | 0,0 | 0,0 | 15,8 |
| 15-44 | N | 12.871 | 10.195 | 1524 | 2273 | 1659 | 2764 | 1921 | 1828 | 45 | 43 | 35.123 |
| n | 170 | 134 | 20 | 30 | 22 | 36 | 25 | 24 | 1 | - | 462 |
| % | 14,1 | 11,2 | 1,7 | 2,5 | 1,8 | 3,0 | 2,1 | 2,0 | 0,0 | 0,0 | 38,6 |
| 45-64 | N | 5489 | 4206 | 731 | 729 | 1515 | 2859 | 4801 | 4301 | 246 | 148 | 25.025 |
| n | 72 | 55 | 10 | 10 | 20 | 38 | 63 | 57 | 4 | 2 | 331 |
| % | 6,0 | 4,6 | 0,8 | 0,8 | 1,7 | 3,1 | 5,3 | 4,7 | 0,3 | 0,2 | 27,5 |
| 65-74 | N | 568 | 551 | 76 | 90 | 305 | 667 | 2765 | 2817 | 261 | 154 | 8254 |
| n | 8 | 7 | 1 | 1 | 4 | 9 | 36 | 37 | 4 | 2 | 109 |
| % | 0,6 | 0,6 | 0,1 | 0,1 | 0,3 | 0,7 | 3,0 | 3,1 | 0,3 | 0,2 | 9,1 |
| 75 o más | N | 214 | 298 | 14 | 35 | 101 | 275 | 2528 | 3795 | 458 | 518 | 8236 |
| n | 3 | 4 | - | - | 1 | 4 | 33 | 50 | 6 | 7 | 108 |
| % | 0,2 | 0,3 | 0,0 | 0,0 | 0,1 | 0,3 | 2,8 | 4,2 | 0,5 | 0,6 | 9,0 |
| Total | N | 24.558 | 20.408 | 3263 | 3907 | 4064 | 7020 | 12.677 | 13.282 | 1018 | 870 | 91.067 |
| n | 325 | 268 | 43 | 51 | 53 | 93 | 166 | 175 | 15 | 11 | 1200 |

N: Número de individuos de la población; n: número de individuos de la muestra; M: sexo masculino; F: Femenino.

Estado 1: sano; Estado 2: problemas agudos; Estado 3: enfermedad crónica menor única; Estado 4: enfermedades crónicas menores en diferentes órganos; Estado 5: enfermedad crónica dominante única; Estado 6: dos enfermedades crónicas dominantes; Estado 7: más de dos enfermedades crónicas dominantes; Estado 8: enfermedad neoplásica metastásica; Estado 9: enfermedades catastróficas.
